# Supplementary material for: Highly porous structure strategy to improve the SnO2 electrode performance for lithium-ion batteries
Source: Royal Society of Chemistry journal article supplement (doi:10.1039/c3cp54144d), 2013-12-02
Supplement: c3cp54144d.pdf [file c3cp54144d.pdf]

## Highly porous structure strategy to improve the SnO<sub>2</sub> electrode performance for lithium-ion batteries

Ting Yang, Bingan Lu\*

Received (in XXX, XXX) Xth XXXXXXXXXX 20XX, Accepted Xth XXXXXXXXXX 20XX

DOI: 10.1039/b000000x

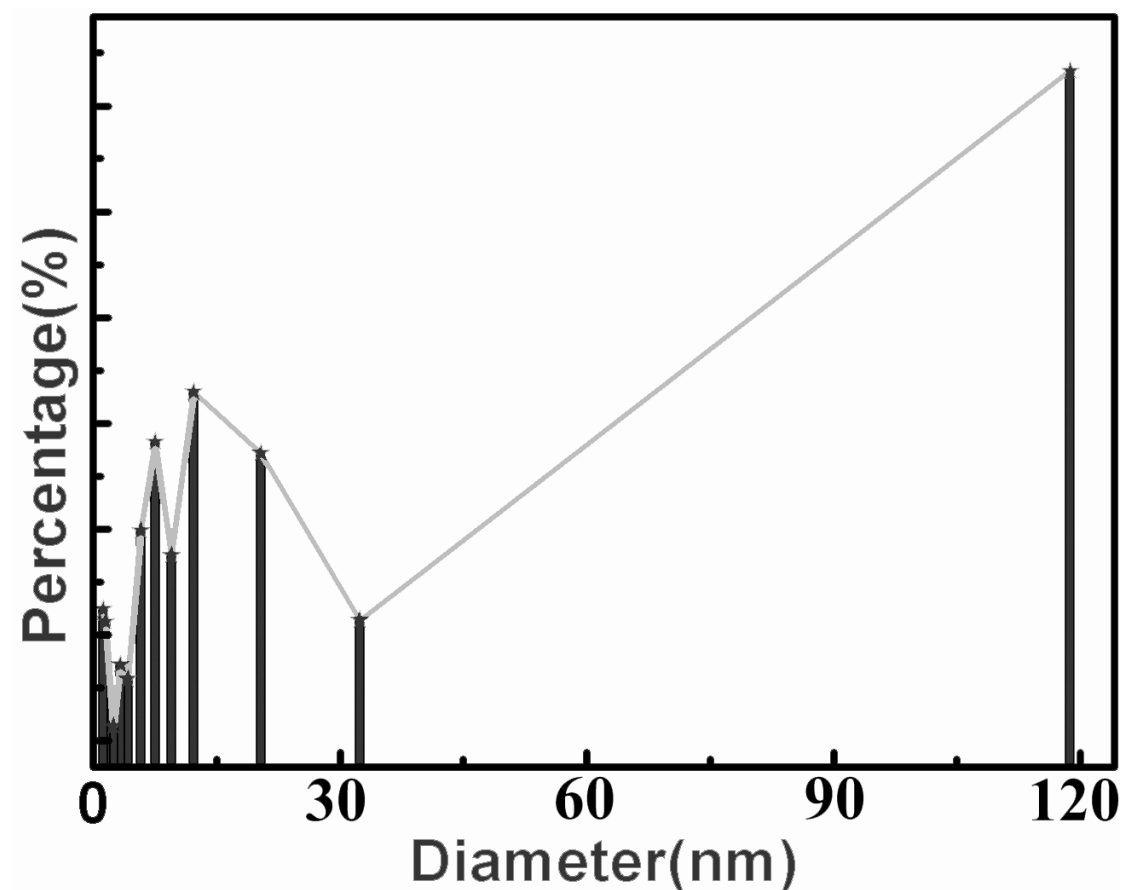

Figure S1 The pore size distribution of nanotubes with highly porous.
